# Supplementary material for: Germ cell-specific sustained activation of Wnt signalling perturbs spermatogenesis in aged mice, possibly through non-coding RNAs
Source: PubMed Central journal article supplement (PMC5349868; doi:10.18632/oncotarget.13920), 2016-12-15
Supplement: oncotarget-07-85709-s001.pdf [file oncotarget-07-85709-s001.pdf]

# Germ cell-specific sustained activation of Wnt signalling perturbs spermatogenesis in aged mice, possibly through non-coding RNAs

Supplementary Material

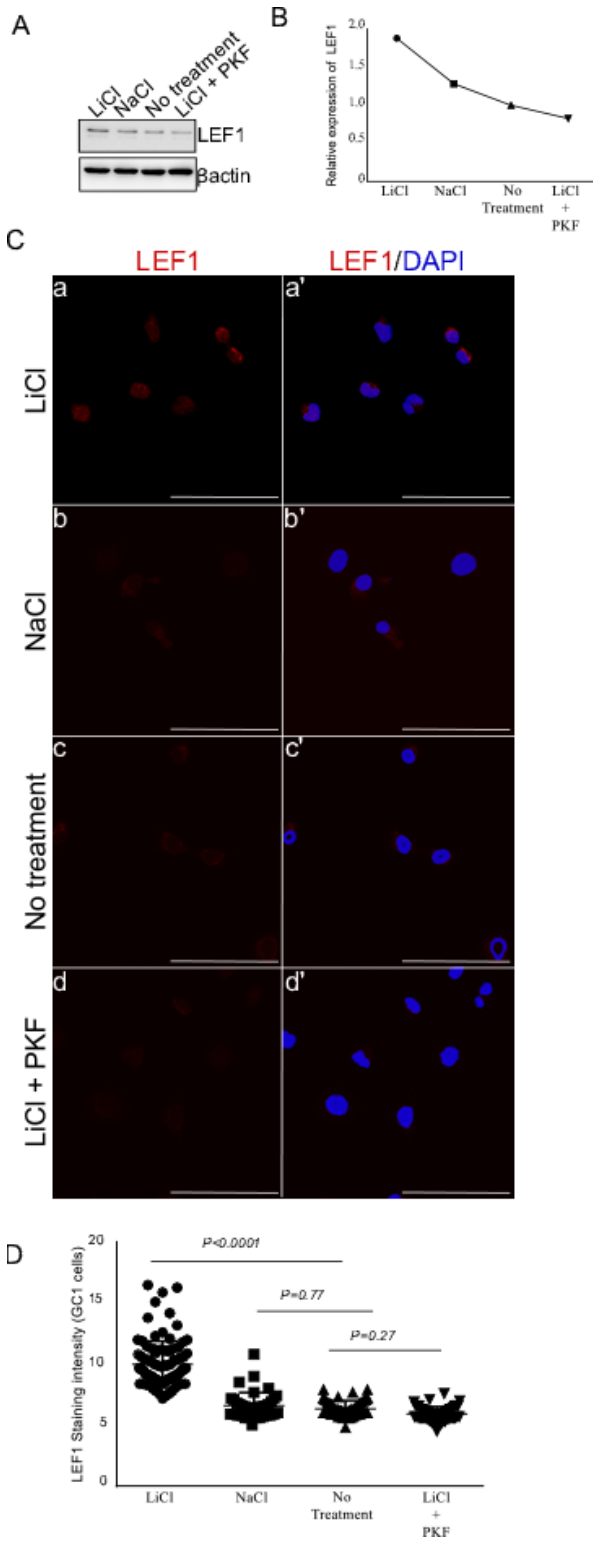

**SFig. 1.** Compared to controls, LiCl treatment increases and PKF treatment decreases the expression of LEF1 protein in GC1 cells.
